## **SPECIAL CARE BABY UNIT NEONATAL DISEASE OUTCOMES IN A TERTIARY HOSPITAL IN NIGERIA: 2-YR RETROSPECTIVE CROSS-SECTIONAL ANALYSIS**

Udochukwu Godswill Anosike<sup>1</sup>, Ugochukwu Godson Amalahu<sup>1</sup>, Chijioke Amara Ezenyeaku<sup>2</sup>, Chika Florence Ubajaka<sup>2</sup>, Anokwulu Ifeanyi Osmond<sup>1</sup>, Chiamaka Sandra Nsude<sup>1</sup>, Joseph Moses Adeniyi<sup>1</sup>, Chinemerem Okonkwo<sup>1</sup>, Uzoma Love Nwajinka<sup>1</sup>, Malachy Echezona DivineFavour<sup>1</sup>, Chukwuemelie Darlington Okeke<sup>3</sup>, Chidozie Valentine Akwiwu-Uzoma<sup>1</sup>

### **Institutional Affiliations:**

<sup>1</sup>Faculty of Medicine, College of Health Sciences, Nnamdi Azikiwe University, Nigeria

<sup>2</sup>Department of Community Medicine, College of Health Sciences, Nnamdi Azikiwe University, Nigeria.

<sup>3</sup>Department of Internal Medicine, Nnamdi Azikiwe University Teaching Hospital, Nigeria.

### **Corresponding Author:**

Udochukwu Godswill Anosike

+2348069518922

Email: [ug.anosike@stu.unizik.edu.ng](mailto:ug.anosike@stu.unizik.edu.ng)

**Disclosures:** Authors have nothing to disclose.

## ABSTRACT

**BACKGROUND:** Neonatal diseases contribute significantly to global under-five mortality. The highest neonatal mortality rate in sub-Saharan Africa can be traced to Nigeria. This study aims to evaluate the outcomes of neonatal admissions in a select tertiary hospital in Nigeria.

**METHODS:** A retrospective analysis of data collected on 656 neonates admitted in the special care baby unit of Nnamdi Azikiwe University Teaching Hospital (NAUTH), Nigeria over a period of 2 years (January 2021 and December 2022). Descriptive analysis and inferential statistics were done at  $p < 0.05$  using SPSS version 25.

**RESULTS:** Median age at presentation was 4 hours (interquartile range 0.5, 24) hours. The Median duration of hospital stay was 6 days (interquartile range 3, 11). The commonest morbidities were perinatal asphyxia ( $n=295/656$ ; 45.0%) and prematurity ( $n=158/656$ ; 24%); while congenital anomalies ( $n=22/47$ ; 46.8%), perinatal asphyxia ( $n=73/295$ ; 24.7%) and prematurity ( $n=35/158$ ; 22.2%) had the highest case fatality rates. Gestational age at birth, duration of hospital stay, place of delivery, and mode of delivery were the variables determined to be statistically associated with outcome of care.

**CONCLUSION:** This study showed a mortality of 22.9% ( $n=150/656$ ) in our study area with perinatal asphyxia (48.7%;  $n=73/150$ ), prematurity (24.0%;  $n=36/150$ ), congenital anomalies (11.3%;  $n=22/150$ ), and neonatal sepsis (6.7%;  $n=10/150$ ) as the primary causes. This work highlights the need for emergency care of critically ill newborns through financing transition from special care baby unit to neonatal intensive care unit across tertiary institutions in Nigeria.

**KEYWORDS:** neonatal disease, outcome, retrospective study, special care baby Higher mortality was recorded among neonates within the first 7 days of hospital stay unit.

## **KEY MESSAGES**

### **What is already known on this topic**

- Poor outcome of neonatal disease is associated with lack of quality care at birth or skilled care and treatment immediately after birth and in the first days of life.
- Premature birth, birth asphyxia, neonatal infections and congenital anomalies are the prominent causes of neonatal deaths.

### **What this study adds**

- Case fatality rate, mortality rate and duration of hospital stay were the primary outcomes assessed in a spectrum of neonatal disease.
- Higher mortality was recorded among neonates within the first 7 days of hospital stay.

### **How this study might affect research, practice, or policy (implications)**

- Our work informs the need for transition from special care baby unit to neonatal intensive care unit across tertiary institutions in Nigeria to enable comprehensive care for critically ill neonates or neonates with severe neonatal morbidities.
- Creates awareness on the need for incorporation of processes that enable safeguarding of neonatal hospital records for tracking of trends and research.

## **1. INTRODUCTION**

Neonatal diseases are a significant global health issue, particularly in high-risk populations, such as preterm babies, and low birth weight neonates. The leading causes of neonatal morbidity and mortality include prematurity and low birth weight, perinatal asphyxia, sepsis and infection.<sup>1,2</sup> Most of these deaths (almost 99%) occur in developing countries (low and middle-income countries).<sup>3</sup> In sub-Saharan Africa, neonatal diseases contribute to 39% of under-five mortality.<sup>4</sup> Nigeria was ranked by World Health Organization as the country with the second highest number of newborn deaths in 2020, averaging about 271,000 deaths.<sup>5</sup> According to Statista 2019, neonatal disorders (25.27%) were the major cause of under-five mortality in Nigeria.<sup>6</sup> Between 2016 and 2017, the neonatal mortality rate (NMR) in Nigeria was 37 per 1000 live births.<sup>7</sup> In other sub-Saharan African countries, NMR, as reported, are Kenya (2015) - 22/1000 live births<sup>8</sup>, Ethiopia (2016) - >35/1000 live births<sup>9</sup>, and Cameroon (2017) - 21/1000 live births.<sup>10</sup> The magnitude of neonatal mortality across tertiary hospitals in various regions and states in Nigeria are as follows – 12.2% in rivers state<sup>11</sup>, and 10.5% in North Central Nigeria (45/428)<sup>12</sup>. This study therefore provides extensive insights into the distribution of neonatal diseases, and the outcomes of admissions in a selected Nigerian hospital.

## **2. METHODS**

### **2.1. STUDY AREA**

This study was conducted in the special care baby unit of Nnamdi Azikiwe University Teaching Hospital, (NAUTH) Nnewi. Nnewi is a commercial and industrial city in Anambra State, Southeastern Nigeria. The special care baby unit of Nnamdi Azikiwe University Teaching Hospital, Nnewi was established in May 1998.<sup>13</sup> It consists of 3 wards (for in-born babies, out-born/referred babies, and isolation), and contains 17 cots, 1 infant radiant warmer, 5 incubators, 2 oxygen cylinders, 5 phototherapy units, 1 apnea monitor and 4 resuscitation kits.

### **2.2. STUDY DESIGN**

This study was a retrospective descriptive cross-sectional study.

### **2.3. STUDY POPULATION**

The study population was newborn babies admitted to the special care baby unit, NAUTH, Nnewi.

### **2.3.1. INCLUSION CRITERIA**

All neonates between 0 and 28 days who presented between January 2021 and December 2022.

### **2.3.2. EXCLUSION CRITERIA**

Neonates with incomplete data on health records, infant of mothers with sickle cell disease, and stable term neonates admitted to special care baby unit.

### **2.4. SAMPLE SIZE DETERMINATION**

This study was a whole population study. The minimum sample size (n) for this study was calculated using Cochran's sample size (n) formula for a known finite population (N).

Where n is Cochran's sample size, given as:

$$n = \frac{z^2 pq}{d^2} \text{ [14](#)}$$

Where, n = minimum sample size.

d= 0.05, desired level of precision (i.e., 5% margin of error)

p = 0.21, using 21% (prevalence of perinatal asphyxia in a tertiary institution) [15](#)

q = 1 – p, which is 0.79

z = 1.96, standard normal deviate at 95% confidence interval (CI)

$$n = \frac{(1.96)^2 * 0.21 * 0.79}{(0.05)^2}$$

$$n = 254.93$$

The minimum sample size, as calculated for the two years studied was approximately 255.

## **2.5. SAMPLING TECHNIQUE**

All folders of neonates that met the inclusion criteria within the study period were retrieved for data collection.

## **2.6. STUDY INSTRUMENT**

A checklist (proforma) was used to obtain information on the patient's profile which included: the mother's age, marital status, occupation, level of education, parity, sex, birth weight, gestational age at birth, age at presentation, diagnosis at presentation, duration of hospital stay, and outcome.

## **2.7. TRAINING OF RESEARCH ASSISTANTS**

Ten (10) medical students in their 5<sup>th</sup> year of study were recruited and trained for a day by the principal researchers as research assistants. They were trained on how to extract the required information from folders using the checklist. The success of the training was assessed with the preliminary data collected. To further ensure data quality, the principal researcher monitored the data collection. There were meetings of the data collection team at the end of each collection day to collate the data.

## **2.8. DURATION OF STUDY**

The study lasted for 3 months, starting from May to July 2023.

## **2.9. DATA COLLECTION METHODS**

With permission from the medical records department and Special Care Baby Unit NAUTH, the medical records of the neonates were identified, retrieved, studied, and the required data were extracted from all that met the inclusion criteria using the checklist.

## **2.10. DATA MANAGEMENT**

### **2.10.1. MEASUREMENT OF VARIABLES**

The main outcome variables for this study were – fatality rate of cases, neonatal mortality rate, duration of hospital stay.

Other variables that affected the outcomes include birth weight, gestational age at birth, place of and delivery.

## **2.10.2. STATISTICAL DATA ANALYSIS**

Data cleaning was done using Microsoft office Excel, version 2021 (Microsoft Corporation, Redmond, WA, USA). Duplicated and incomplete data were removed. Further analysis of data was done using Statistical Package for Social Sciences (SPSS) version 25 (IBM Corp., Armonk, NY, USA). All continuous variables were tested for normality using Shapiro-Wilks's test and found not to be normally distributed. Thus, median, and interquartile ranges were used as measures of central tendency for them. Quantitative variables were further divided into categories. Categorical variables were summarized using tables of frequencies and percentages. The Fisher's exact test with Bonferroni correction was used for testing the significance of associations between outcome of hospital admissions and various variables. The level of significance was set at  $P < 0.05$ .

## **2.11. ETHICAL CONSIDERATIONS**

Approval was obtained from the Nnamdi Azikiwe University Teaching Hospital Health Research Ethics Committee (NAUTHHREC) through the Head of the Department of Community Medicine, Nnamdi Azikiwe University. Permission was also obtained from the Pediatrics Head of Department, Special Care Baby Unit and Head of the Department of Medical Records. The data extracted from the case notes was treated with utmost confidentiality, and patient names and other details that could lead to their identification were excluded to maintain anonymity.

## **3. RESULTS**

The total number of neonatal admissions between 2021 and 2022 was 973. 32% of health records ( $n=312/973$ ) were not assessed due to the missing health records and incompleteness of data as required by proforma. 5 out of 661 assessed health records were excluded – stable term neonates (4) and infant of mother with sickle cell disease (1).

**Table 1.1: Characteristics of neonates admitted to special care baby unit NAUTH.**

| Variable                                |                  | Frequency (n=656) | Percentage (%) |
|-----------------------------------------|------------------|-------------------|----------------|
| <b>Sex of child</b>                     | Male             | 368               | 56.1           |
|                                         | Female           | 288               | 43.9           |
| <b>Gestational age (weeks)</b>          | <28              | 26                | 4.0            |
|                                         | 28 0/7 to 31 6/7 | 86                | 13.1           |
|                                         | 32 0/7 to 36 6/7 | 148               | 22.6           |
|                                         | 37 0/7 to 41 6/7 | 396               | 60.3           |
| Mean = 35.7 2 ± 3.95                    |                  |                   |                |
| <b>Birthweight (grams)</b>              | <1000            | 22                | 3.4            |
|                                         | 1000-1499        | 79                | 12.0           |
|                                         | 1500-2499        | 183               | 27.9           |
|                                         | 2500-4000        | 328               | 50.0           |
|                                         | >4000            | 44                | 6.7            |
| Mean = 2571.62 ± 963.12                 |                  |                   |                |
| <b>Place of delivery</b>                | Outborn          | 412               | 62.8           |
|                                         | Inborn           | 238               | 36.3           |
|                                         | Home             | 6                 | 0.9            |
| <b>Age at presentation</b>              | 0-12 hours       | 389               | 59.3           |
|                                         | 13-24 hours      | 117               | 17.8           |
|                                         | 1-2 days         | 59                | 9.0            |
|                                         | >4 days          | 91                | 13.9           |
| Median (IQR) = 4 (0.5-24) hours         |                  |                   |                |
| <b>Duration of hospital stay (days)</b> | <7               | 340               | 51.8           |
|                                         | 7-14             | 211               | 32.2           |
|                                         | 15-30            | 77                | 11.7           |
|                                         | >30              | 28                | 4.3            |
| Median (IQR) = 6 (3-11)                 |                  |                   |                |

As shown in table 1.1, a higher percentage of neonates (56.1%) were males. 60.3% (n=396/656) were term neonates between 37-42 weeks. 50.0% (n=326/656) of neonates had their birth weight between 2500-4000g. Most of the children were outborn (62.8%). A higher percentage presented



at age less than 13 hours (59.3%). duration of hospital stay for most newborns was below 7 days (51.8%).

**Table 1.2: Maternal characteristics**

| <b>Variable</b>                |                              | <b>Frequency (n=656)</b> | <b>Percentage (%)</b> |
|--------------------------------|------------------------------|--------------------------|-----------------------|
| <b>Age of mother (years)</b>   | 18-29                        | 340                      | 51.8                  |
|                                | 30-39                        | 271                      | 41.3                  |
|                                | >39                          | 45                       | 6.9                   |
| Median (IR) = 29 (25-34) years |                              |                          |                       |
| <b>Marital status</b>          | Single                       | 23                       | 3.5                   |
|                                | Married                      | 633                      | 96.5                  |
| <b>Parity</b>                  | Primipara                    | 223                      | 34.0                  |
|                                | Multipara                    | 433                      | 66.0                  |
| <b>Educational level</b>       | Tertiary                     | 212                      | 32.3                  |
|                                | Secondary                    | 388                      | 59.1                  |
|                                | Primary                      | 37                       | 5.6                   |
|                                | No formal                    | 19                       | 2.9                   |
| <b>Occupation</b>              | Unemployed                   | 50                       | 7.6                   |
|                                | Trader                       | 366                      | 55.8                  |
|                                | Student                      | 45                       | 6.9                   |
|                                | Professional                 | 42                       | 6.4                   |
|                                | Housewife                    | 91                       | 13.9                  |
|                                | Civil servant                | 56                       | 8.5                   |
|                                | Artisan                      | 6                        | 0.9                   |
| <b>Religion</b>                | Muslim                       | 3                        | 0.5                   |
|                                | Christian                    | 653                      | 99.5                  |
| <b>Ethnicity</b>               | Igbo                         | 653                      | 99.5                  |
|                                | Hausa                        | 3                        | 0.5                   |
| <b>Mode of delivery</b>        | Spontaneous vaginal delivery | 388                      | 59.1                  |
|                                | Emergency caesarean section  | 204                      | 31.1                  |

---

|                                      |                            |     |      |
|--------------------------------------|----------------------------|-----|------|
|                                      | Elective caesarean section | 60  | 9.1  |
|                                      | Assisted vaginal delivery  | 4   | 0.6  |
| <b>Premature rupture of membrane</b> | Yes                        | 114 | 17.4 |
|                                      | No                         | 542 | 82.6 |
| <b>Peripartum fever</b>              | Yes                        | 162 | 24.7 |
|                                      | No                         | 494 | 75.3 |
| <b>Dexamethasone administration</b>  | Yes                        | 143 | 21.8 |
|                                      | No                         | 513 | 78.2 |

---

As shown in table 1.2, the age of the women ranged from 18 to 53 years with median age of 29 years (interquartile range 25,34).

**Table 1.3: Distribution of neonatal diseases in special care baby unit NAUTH.**

| Diagnosis at presentation          | Frequency (n-656) | Percentage (%) |
|------------------------------------|-------------------|----------------|
| Congenital anomalies               | 47                | 7.2            |
| Macrosomia                         | 26                | 4              |
| Neonatal jaundice                  | 34                | 5              |
| Neonatal sepsis                    | 63                | 9.6            |
| Perinatal asphyxia                 | 295               | 45             |
| Prematurity                        | 158               | 24             |
| Respiratory distress syndrome      | 17                | 2.6            |
| Transient tachypnea of the newborn | 7                 | 1.1            |
| Vitamin K deficiency bleeding      | 9                 | 1.4            |

As shown in table 1.3, the most common cases diagnosed were perinatal asphyxia (45.0%), prematurity (24%), neonatal sepsis (9.6%), congenital anomalies (7.2%) and neonatal jaundice (5.2%).

**Table 1.4: Outcome of admission for neonatal diseases in the special care baby unit NAUTH.**

| <b>Outcome of care</b> | <b>Frequency (n=656)</b> | <b>Percentage (%)</b> |
|------------------------|--------------------------|-----------------------|
| DAMA                   | 32                       | 4.9                   |
| Died                   | 150                      | 22.9                  |
| Discharged             | 454                      | 69.2                  |
| Transferred            | 20                       | 3.0                   |

DAMA = Discharged against medical advice

As displayed in table 1.4 - Greater percentage of neonates admitted were discharged (69.2%). More than one-fifth died (22.9%).

**Table 1.5: Relationship between diagnosis at presentation and outcome of care (n=656)**

| Diagnosis at presentation          | Outcome n (%) |            |          |         | F(p)            |
|------------------------------------|---------------|------------|----------|---------|-----------------|
|                                    | Transferred   | Discharged | Died     | DAMA    |                 |
| Congenital anomalies               | 7(14.9)       | 17(36.2)   | 22(46.8) | 1(2.1)  | 89.750 (<0.001) |
| Macrosomia                         | 0             | 23(88.5)   | 2(7.7)   | 1(3.8)  |                 |
| Neonatal jaundice                  | 0             | 22(64.7)   | 6(17.6)  | 6(17.6) |                 |
| Neonatal sepsis                    | 4(6.3)        | 47(74.6)   | 10(15.9) | 2(3.2)  |                 |
| Perinatal asphyxia                 | 6(2.0)        | 205(69.5)  | 73(24.7) | 11(3.7) |                 |
| Prematurity                        | 0             | 114(72.1)  | 35(22.2) | 9(5.7)  |                 |
| Respiratory distress syndrome      | 2(11.8)       | 11(64.7)   | 2(11.8)  | 2(11.8) |                 |
| Transient tachypnea of the newborn | 1(14.3)       | 6(85.7)    | 0        | 0       |                 |
| Vitamin K deficiency bleeding      | 0             | 9(100)     | 0        | 0       |                 |

Table 1.5. statistically shows there is an association between diagnosis at presentation and outcome of care. Neonates with congenital anomalies were more likely to die. Discharge against medical advice was more likely among those with neonatal jaundice. Neonates with Vitamin K deficiency and macrosomia were more likely to be discharged.

**Table 1.6: Analysis of maternal factors influencing burden of neonatal diseases in special care baby unit NAUTH (n=656)**

| Variables                            |                              | Outcome n (%) |            |           |         | F(p)        |
|--------------------------------------|------------------------------|---------------|------------|-----------|---------|-------------|
|                                      |                              | Transferred   | Discharged | Died      | DAMA    |             |
| <b>Age of mother (years)</b>         | 18-29                        | 10(2.9)       | 234(68.8)  | 74(21.8)  | 22(6.5) | 5.16(0.49)  |
|                                      | 30-39                        | 8(3)          | 191(70.5)  | 63(23.2)  | 9(3.3)  |             |
|                                      | >39                          | 2(4.4)        | 29(64.4)   | 13(28.9)  | 1(2.2)  |             |
| <b>Marital status</b>                | Single                       | 1(4.3)        | 13(56.5)   | 8(34.8)   | 1(4.3)  | 2.78(0.37)  |
|                                      | Married                      | 19(3)         | 441(69.7)  | 142(22.4) | 31(4.9) |             |
| <b>Level of education</b>            | Tertiary                     | 8(3.8)        | 145(68.4)  | 47(22.2)  | 12(5.7) | 4.80(0.81)  |
|                                      | Secondary                    | 10(2.6)       | 271(69.8)  | 88(22.7)  | 19(4.9) |             |
|                                      | Primary                      | 2(5.4)        | 24(64.9)   | 11(29.7)  | 0       |             |
|                                      | No formal                    | 0             | 14(73.7)   | 4(21.1)   | 1(5.3)  |             |
| <b>Occupation</b>                    | Unemployed                   | 3(6)          | 33(66)     | 13(26)    | 1(2)    | 5.69(0.15)  |
|                                      | Trader                       | 13(3.6)       | 257(70.2)  | 77(21)    | 19(5.2) |             |
|                                      | Student                      | 2(4.4)        | 30(66.7)   | 10(22.2)  | 3(6.7)  |             |
|                                      | Professional                 | 1(2.4)        | 27(64.3)   | 12(28.6)  | 2(4.8)  |             |
|                                      | Housewife                    | 0             | 63(69.2)   | 23(25.3)  | 5(5.5)  |             |
|                                      | Civil servant                | 1(1.8)        | 42(75)     | 11(19.6)  | 2(3.6)  |             |
|                                      | Artisan                      | 0             | 2(33.3)    | 4(66.7)   | 0       |             |
| <b>Parity</b>                        | Primipara                    | 7(3.1)        | 150(67.3)  | 52(23.3)  | 14(6.3) | 1.68(0.64)  |
|                                      | Multipara                    | 13(3)         | 304(70.2)  | 98(22.6)  | 18(4.2) |             |
| <b>Mode of delivery</b>              | Spontaneous vaginal delivery | 12(3.1)       | 259(66.8)  | 97(25)    | 20(5.2) | 22.37(0.01) |
|                                      | Emergency caesarean section  | 7(3.4)        | 144(70.6)  | 43(21.1)  | 10(4.9) |             |
|                                      | Elective caesarean section   | 1(1.7)        | 51(85)     | 8(13.3)   | 0       |             |
|                                      | Assisted vaginal delivery    | 0             | 0          | 2(50)     | 2(50)   |             |
| <b>Premature rupture of membrane</b> | Yes                          | 1(0.9)        | 78(68.4)   | 30(26.3)  | 5(4.4)  | 2.69(0.44)  |
|                                      | No                           | 19(3.5)       | 376(69.4)  | 120(22.1) | 27(5)   |             |
| <b>Peripartum fever</b>              | Yes                          | 7(4.3)        | 118(72.8)  | 30(18.5)  | 7(4.3)  | 3.52(0.31)  |

|                                     |     |         |           |           |         |             |
|-------------------------------------|-----|---------|-----------|-----------|---------|-------------|
|                                     | No  | 13(2.6) | 336(68)   | 120(24.3) | 25(5.1) |             |
| <b>Dexamethasone administration</b> | Yes | 1(0.7)  | 89(62.2)  | 46(32.2)  | 7(4.9)  | 11.19(0.01) |
|                                     | No  | 19(3.7) | 365(71.2) | 104(20.3) | 25(4.9) |             |

Table 1.6 shows the result of association between outcome of care and maternal factors. Neonates delivered by elective caesarean section were more likely to be discharged; those by assisted vaginal delivery were likely to DAMA; those whose mothers did not receive dexamethasone were less likely to die.

**Table 1.7: Analysis of neonatal factors influencing outcomes in special care baby unit NAUTH (n=656)**

| Variables                               | Outcome n (%) |             |            |          |         | F(p)           |
|-----------------------------------------|---------------|-------------|------------|----------|---------|----------------|
|                                         |               | Transferred | Discharged | Died     | DAMA    |                |
| <b>Sex</b>                              | Male          | 13(3.5)     | 247(67.1)  | 92(25)   | 16(4.3) | 3.30(0.34)     |
|                                         | Female        | 7(2.4)      | 207(71.9)  | 58(20.1) | 16(5.6) |                |
| <b>Gestational age at birth (weeks)</b> | <28           | 0           | 8(30.8)    | 18(69.2) | 0       | 43.822(<0.001) |
|                                         | 28-32         | 0           | 55(64)     | 24(27.9) | 7(8.1)  |                |
|                                         | 33-36         | 6(4.1)      | 113(76.4)  | 23(15.5) | 6(4.1)  |                |
|                                         | 37-42         | 14(3.5)     | 278(70.2)  | 85(21.5) | 19(4.8) |                |
| <b>Birth weight (grams)</b>             | <1000         | 0           | 5(22.7)    | 17(77.3) | 0       | 44.189(<0.001) |
|                                         | 1000-1499     | 2(2.5)      | 53(67.1)   | 1(24.1)  | 5(6.3)  |                |
|                                         | 1500-2499     | 5(2.7)      | 132(72.1)  | 35(19.1) | 11(6.0) |                |
|                                         | 2500-4000     | 12(3.7)     | 228(69.5)  | 72(22.0) | 16(4.9) |                |
|                                         | >4000         | 1(2.3)      | 36(81.8)   | 7(15.9)  | 0       |                |

|                                         |             |         |           |           |         |              |
|-----------------------------------------|-------------|---------|-----------|-----------|---------|--------------|
| <b>Place of delivery</b>                | Outborn     | 17(4.1) | 257(62.4) | 116(28.2) | 22(5.3) | 26.42(<0.01) |
|                                         | Inborn      | 3(1.3)  | 192(80.7) | 33(13.9)  | 10(4.2) |              |
|                                         | Home        | 0       | 5(83.3)   | 1(16.7)   | 0       |              |
| <b>Age at presentation</b>              | 0-12 hours  | 8(2.1)  | 278(71.5) | 86(22.1)  | 17(4.4) | 22.01(0.006) |
|                                         | 13-24 hours | 5(4.3)  | 73(62.4)  | 31(26.5)  | 8(6.8)  |              |
|                                         | 1-2 days    | 4(6.8)  | 49(83.1)  | 6(10.2)   | 0       |              |
|                                         | >4 days     | 3(3.3)  | 54(59.3)  | 27(29.7)  | 7(7.7)  |              |
|                                         |             |         |           |           |         |              |
| <b>Duration of hospital stay (days)</b> | <7          | 7(2.1)  | 190(55.9) | 126(37.1) | 17(5)   | 93.51(<0.01) |
|                                         | 7-14        | 7(3.3)  | 180(85.3) | 15(7.1)   | 9(4.3)  |              |
|                                         | 15-30       | 6(7.8)  | 62(80.5)  | 5(6.5)    | 4(5.2)  |              |
|                                         | >30         | 0       | 22(78.6)  | 4(14.3)   | 2(7.1)  |              |

Among the variables in Table 1.7 - Gestational age (GA), place of delivery and duration of hospital stay were associated with care outcome. Neonates at 33-36 weeks GA, who are inborn and had duration of hospital stay between 7-30 days were more likely to be discharged. Neonates at <28 weeks GA and are outborn were more likely to die.



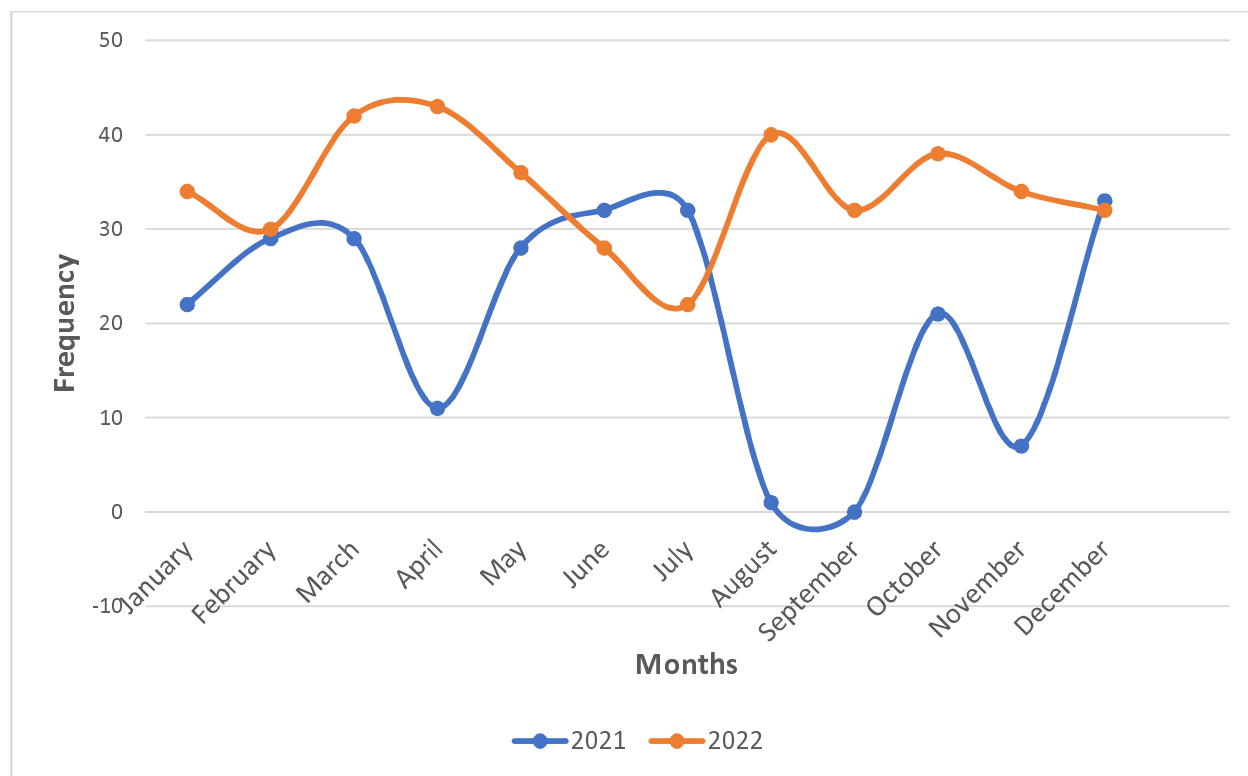

**Fig. 1: Monthly pattern of neonatal admissions for 2021 and 2022.** The comparison of cases between year 2021 and 2022 is shown in supplemental fig. 1. In the year 2021, a higher percentage of cases were seen in the months of June, July, and December. Conversely, the year 2022 had a higher percentage of cases in the other months.

#### 4. DISCUSSION

Findings from this study showed a high burden of neonatal morbidity and mortality in hospitalized newborns (656) admitted to special care baby unit in NAUTH, Anambra State with a mortality of 22.9% (n=150/656). This contrasts with a similar study carried out in our study area by Ezechukwu et al which reported a mortality of 19.4% (n=166/854).<sup>13</sup> This demonstrates a 15.2% increase in neonatal mortality since 2001. Reports from other studies showed lower mortality in tertiary institutions in rivers state (12.2%)<sup>11</sup>, and 10.5% in North Central Nigeria<sup>12</sup>

The primary causes of mortality were perinatal asphyxia (48.7%; n=73/150), prematurity (21.3%; n=35/150), congenital anomalies (11.3%; n=22/150), and neonatal sepsis (6.7%; n=10/150). These findings align with a study conducted at ESUTH, which also identified perinatal asphyxia as the predominant cause of mortality.<sup>16</sup> The highest case fatality rate in this study was recorded amongst neonates with congenital anomalies (n=22/47; 46.8%), perinatal asphyxia (n=73/295; 24.7%) and prematurity (n=35/158; 22.2%). In contrast, other studies reported neonates with respiratory distress syndrome<sup>17</sup>, neonatal sepsis<sup>11</sup> as morbidities with the highest case fatality rate.

Prematurity, perinatal asphyxia, neonatal sepsis, neonatal jaundice, congenital anomalies as reported by Ezechukwu et al 2005<sup>13</sup> have remained the prevalent disorders in NAUTH. Our study indicate that perinatal asphyxia was the leading cause of neonatal admissions, accounting for 45.0% of cases. Additionally, prematurity, neonatal sepsis, congenital anomalies, and neonatal jaundice contributed to 24.8%, 9.6%, 7.2% and 5.2% of admissions, respectively. These results are consistent with findings from other medical centers across Nigeria.<sup>16, 18,19</sup> Congenital anomalies noted in our study area were gastroschisis, omphalocele, trachea-esophageal fistula, encephalocele, VACTERL, spina bifida, Hirschsprung disease, jejunal atresia, pyloric stenosis, anorectal malformation, and imperforate anus. The congenital anomalies consistent with that reported in a tertiary health facility in Niger Delta region by Abolodje et al 2021<sup>17</sup> are omphalocele, gastroschisis, spinal dysraphism, encephalocele and multiple congenital anomalies (VACTERL).

The distribution of neonatal diseases in our study area differs considerably with that reported in other study areas Neonatal Sepsis – 9.6% (NAUTH) vs 37.6% (ABUTH)<sup>20</sup>, 38.95% (UNIBEN)<sup>21</sup>; Neonatal Jaundice – 5.2% (NAUTH) vs 15% (EKSUTH)<sup>22</sup> and 35.94% (OKSUTH)<sup>23</sup>; Respiratory Distress Syndrome – 2.6% (NAUTH) vs 58.4% (WGH Ilesa)<sup>24</sup>; Perinatal Asphyxia – 45.0% (NAUTH) vs 11.1% (MASUTH)<sup>25</sup> and 29.4% (UPTH)<sup>26</sup>. This shows that other centers have higher burden of admissions for neonates with sepsis, jaundice, and respiratory distress syndrome except perinatal asphyxia. The reasons for these disparities could be alluded to the difference in hospital settings and availability of health records. In Fig 1.1, the absence of admissions during the months of August and September 2021 was a

consequence of a strike action carried out by the national association of resident doctors, which spanned from August 2<sup>nd</sup> to October 5<sup>th</sup>, 2021.

In this study, a higher proportion of admitted neonates (62.8%) were found to be outborn. This trend can be linked to the prevailing preference for traditional birth attendants, local maternities, and non-specialist hospitals, which are perceived as offering more cost-effective childbirth services.<sup>27</sup> Consequently, neonates are referred to NAUTH when complications arise during childbirth. This finding however differs from findings in other studies conducted at UBTH and ESUTH, where the majority of admitted neonates were inborn.<sup>16,28</sup> The Implications of this finding are of considerable importance, as it sheds light on the regional disparities in neonatal care and underscores the influence of cultural beliefs on childbirth practices.

Findings from this study show a significant difference in mortality ratio (2:1) between outborn (n=116/412) and inborn (n=33/238). This discrepancy is likely due to the advantages of birth deliveries by skilled health professional, closer scrutiny provided to inborn babies by specialist and experienced doctors, enabling early detection of subtle signs of diseases in newborns. Moreover, the convenience of transferring sick babies delivered in the center to specialized care units (SCBUs) may contribute to the lower mortality rate compared to those born outside the center. The finding is consistent with similar studies conducted in other Nigerian centers, indicating a trend that spans across different locations.<sup>18,28,29</sup> Most neonatal deaths occurred within the first 24 hours in this study. The finding is consistent with similar studies conducted in other Nigerian centers.<sup>16,30</sup> This emphasizes the critical need for immediate attention and resuscitation measures to prevent mortality.

As a tertiary institution, 69.2% discharge rate of admitted neonates in our study area poses a concern as to the adequacy of neonatal care efforts. This indicates the need for urgent improvement in the overall neonatal care outcome. Also, the rate of discharge against medical advice (DAMA) was observed to be 4.9% and was attributed to financial constraints and prolonged hospital stay. This finding demonstrates a notable difference when compared to a previous study conducted at UPTH, which reported a DAMA rate of 15%.<sup>29</sup> The higher DAMA rate observed in UPTH was caregivers' preference of alternative medicine over continuing hospital treatment due to financial constraints.

Statistically, gestational age at birth, mode of delivery, place of delivery, and duration of hospital stay have shown significant association with neonatal outcome in NAUTH. Our study showed mortality being more likely among premature neonates: <28 weeks as well as outborn neonates. Discharge was more likely among inborn neonates, those delivered by elective caesarean section, those with gestational age of 33-36 weeks and hospital duration between 7-30 days. Neonates with jaundice as well as those delivered by assisted vaginal delivery were more likely to DAMA. Consistent with findings by Nabwera et al<sup>31</sup>, inborn neonates were less likely to die compared to outborn neonates.

## **5. Study Limitations**

Data availability in the health records was constrained for the 973 admitted neonates. With just 661 records extracted. Limited data for comprehensive analysis may have introduced outcome bias. Secondary outcome variables (such as caregiver satisfaction and cost of care) could not be evaluated due to the nature of this study.

## **6. CONCLUSION**

There is a wide distribution of neonatal diseases in our study area. This phenomenon underscores the critical issue of healthcare accessibility and affordability for specific segments of the population. The study identified associations between care outcomes and factors such as gestational age, delivery mode, birth weight, place of delivery, age at presentation, hospital stay duration. Since mortality was more common in outborn neonates, referral pathways and resources to provide appropriate care need to be prioritized. Despite the comparatively low DAMA rate in our study, it is crucial to recognize that there remains a pressing need to address healthcare disparities and ensure equitable access to medical services. Our study limitations highlight the need to securely keep and store neonatal data for research and clinical purposes. To reduce the burden of neonatal diseases and improve the outcome of neonatal admissions - strengthening perinatal care, emergency obstetric services, and enhancement of neonatal resuscitation skills to traditional birth attendants (TBAs) and other community health workers are key.

## **FUNDING STATEMENT**

This research received no specific grant from any funding agency in the public, commercial or not-for-profit sectors.

## **CONTRIBUTORSHIP STATEMENT**

Conceptualization: Udochukwu Godswill Anosike, Ugochukwu Godson Amalahu.

Planning: Udochukwu Godswill Anosike, Ugochukwu Godson Amalahu, Chijioke Amara Ezenyeaku, Chika Florence Ubajaka, Anokwulu Ifeanyi Osmond.

Data collation: Udochukwu Godswill Anosike, Ugochukwu Godson Amalahu, Chiamaka Sandra Nsude, Joseph Moses Adeniyi, Chinemerem Okonkwo, Uzoma Love Nwajinka, Chidozie Valentine Akwiwu Uzoma, Chukwuemelie Darlington Okeke.

Data analysis: Anokwulu Ifeanyi Osmond, Malachy Echezona DivineFavour, Udochukwu Godswill Anosike, Ugochukwu Godson Amalahu.

Reporting and Editing: Udochukwu Godswill Anosike, Ugochukwu Godson Amalahu, Chijioke Amara Ezenyeaku, Chika Florence Ubajaka, Malachy Echezona DivineFavour.

## REFERENCES

1. Oza S, Lawn JE, Hogan DR, Mathers C, Cousens SN. Neonatal cause-of-death estimates for the early and late neonatal periods for 194 countries: 2000-2013. *Bull World Health Organ.* 2015 Jan 1;93(1):19-28. doi: 10.2471/BLT.14.139790. Epub 2014 Nov 17. PMID: 25558104; PMCID: PMC4271684.
2. Lawn JE, Kerber K, Enweronu-Laryea C, Cousens S. 3.6 million neonatal deaths--what is progressing and what is not? *Semin Perinatol.* 2010 Dec;34(6):371-86. doi: 10.1053/j.semperi.2010.09.011. PMID: 21094412.
3. Bryce J, Boschi-Pinto C, Shibuya K, Black RE. WHO estimates of the causes of death in children. *Lancet.* 2005;365(9465):1147–1152.
4. UNICEF. Neonatal mortality. Available from: <https://data.unicef.org/topic/child-survival/neonatal-mortality/>. [Accessed March 18,2023].
5. World Health Organization. Newborn mortality. Available from: <https://www.who.int/news-room/fact-sheets/detail/levels-and-trends-in-child-mortality-report-2021> [Accessed March 18, 2023].
6. Statista. Nigeria: main causes of infant mortality. Available from: <https://www.statista.com/statistics/1172807/main-causes-of-infant-mortality-in-nigeria>. [Accessed April 2, 2023]
7. UNICEF. World is failing newborn babies, says UNICEF. Available from: <https://www.unicef.org/nigeria/press-releases/world-failing-newborn-babies-says-unicef>. [Accessed May 16, 2023].
8. Gitobu CM, Gichangi PB, Mwanda WO. The effect of Kenya's free maternal health care policy on the utilization of health facility delivery services and maternal and neonatal mortality in public health facilities. *BMC Pregnancy Childbirth.* 2018;18(1):77.

9. Tekleab AM, Amaru GM, Tefera YA. Reasons for admission and neonatal outcome in the neonatal care unit of a tertiary care hospital in Addis Ababa: a prospective study. *Research and Reports in Neonatology*. 2016; 6:17–23.
10. Ndombo PK, Ekei QM, Tochie JN, Temgoua MN, Angong FTE, Ntock FN, et al. A cohort analysis of neonatal hospital mortality rate and predictors of neonatal mortality in a sub-urban hospital of Cameroon. *Italian Journal of Pediatrics*. 2017;43(1): 52.
11. West BA, Onubogu U, Arthur A. Pattern of neonatal mortality at a special care baby unit in Rivers state, Nigeria. *Asian Journal of Pediatric Research*. 2022;10(2):15–25.
12. Abolodje E. Neonatal mortality: morbidity pattern and risk factors in a resource limited centre in North Central Nigeria. *Sri Lanka Journal of Child Health*. 2021;50(3):408–15.
13. Ezechukwu CC, Ugochukwu EF, Egbuonu I, Chukwuka JO. Risk factors for neonatal mortality in a regional tertiary hospital in Nigeria. *Nigerian Journal of clinical practice*. 2004;7(2):50-2.
14. Sample size in statistics (how to find it): Excel, Cochran’s formula, general tips. *Statistics how to*. 2017. <https://www.statisticshowto.com/probability-and-statistics/find-sample-size/>
15. Ilah B, Aminu M, Musa A, Adelokun M, Adeniji A, Kolawole T. Prevalence, and risk factors for perinatal asphyxia as seen at a specialist hospital in gusau, Nigeria. *Sub-Saharan Afr J Med*. 2015;2(2):64
16. Ekwochi U, Ndu IK, Nwokoye IC, Ezenwosu OU, Amadi OF, Osuorah D. Pattern of morbidity and mortality of newborns admitted into the sick and special care baby unit of Enugu State University Teaching Hospital, Enugu state. *Nigerian Journal of Clinical Practice*. 2014;17(3):346-
17. Abolodje E, Ekpebe P, Onyeaso U, Cummings H, Odion-Obomhense H, Ovili C. Neonatal morbidity, and mortality pattern in a tertiary health facility in the Niger Delta region: a 2-year review. *Journal of Research in Basic and Clinical Sciences*. 2021;2(2):25-31.

18. Mukhtar-Yola M, Iliyasu Z. A review of neonatal morbidity and mortality in Aminu Kano Teaching Hospital, northern Nigeria. *Tropical Doctor*. 2007;37(3):130–2.
19. Okechukwu AA, Achonwa A. Morbidity and mortality patterns of admissions into the special care baby unit of University of Abuja Teaching Hospital, Gwagwalada, Nigeria. *Nigerian Journal of Clinical Practice*. 2009;12(4):389-94.
20. Olorukooba A, Ifusemu W, Ibrahim M, Jibril M, Amadu L, Lawal B. Prevalence, and factors associated with neonatal sepsis in a tertiary hospital, northwest Nigeria. *Nigerian Medical Journal*. 2020;61(2):60.
21. Omoregie R, Egbe CA, Dirisu J, Ogefere HO. Microbiology of neonatal septicemia in a tertiary hospital in Benin city, Nigeria. *Biomarkers and Genomic Medicine*. 2013;5(4):142–6.
22. Awe OO, Olawade DB, Afolalu TD, Wada OZ, Alabi DD. Prevalence of jaundice among neonates admitted in a tertiary hospital in southwestern Nigeria. *Advances in Pediatrics and Neonatal care*. 2021;3(1):121
23. Olatubi MI, Ibitoye OF, Sadibo O, Bolarinwa OS, Adamolekun MMM. Prevalence of neonatal jaundice at a tertiary health institution in Ondo state, Nigeria. *Journal of Pre-Clinical and Clinical Research*. 2019;13(3):114–7.
24. Kuti BP, Mohammed LO, Oladimeji OI, Ologun BG, Kuti DK, Fawale OO. Respiratory distress in Nigerian neonates: prevalence, severity, risk, and etiological factors and outcome. *Nigerian Journal of Basic and Clinical Sciences*. 2018;15(1):42.
25. Ochoga MO, Ejeliogu EU, Michael A, Ajeh AO, Abah RO, Esegbe EE, et al. Prevalence, risk factors and outcomes of perinatal asphyxia in newborns at Benue State University Teaching Hospital Makurdi. *Journal of Research in Basic and Clinical Sciences*. 2021;2(1):17–24.
26. West B, Opara P. Perinatal asphyxia in a specialist hospital in Port Harcourt, Nigeria. *Nigerian Journal of Paediatrics*. 2013;40(3):206–10.
27. Ebuehi OM, Akintujoye Ia. Perception and utilization of traditional birth attendants by pregnant women attending primary health care clinics in a rural Local Government Area in Ogun



State, Nigeria. *Int J Womens Health*. 2012; 4:25-34. doi: 10.2147/IJWH.S23173. Epub 2012 Feb 7. PMID: 22371657; PMCID: PMC3282603.

28. Omoigberale AI, Sadoh WE, Nwaneri DU. A 4-year review of neonatal outcome at the University of Benin Teaching Hospital, Benin city. *Nigerian Journal of Clinical Practice*. 2010;13(3):321-5.

29. Okagua J, Obikwu U. Morbidity and mortality pattern of neonates admitted into the special care baby unit of University of Port Harcourt Teaching Hospital, Nigeria. *East African Medical Journal*. 2017; 94:259-265.

30. Toma B, Ige O, Abok I, Onwuanaku C, Abah R, Donli A. Pattern of neonatal admissions and outcome in a tertiary institution in north central Nigeria. *Journal of Medicine in the Tropics*. 2013;15(2):121-125

31. Nabwera HM, Wang D, Tongo OO, Andang'o PEA, Abdulkadir I, Ezeaka CV, et al. Burden of disease and risk factors for mortality amongst hospitalized newborns in Nigeria and Kenya. *PLoS One*. 2021;16(1): e0244109.
